# Supplementary material
Source: PubMed Central journal article supplement (PMC2741181)
Supplement: NIHMS127460-supplement-Supplementary.pdf [file NIHMS127460-supplement-Supplementary.pdf]

## Large Nucleotide-Dependent Conformational Change in Rab28

Sung Haeng Lee<sup>a,b</sup>, Kyuwon Baek<sup>a</sup>, and Roberto Dominguez<sup>a,\*</sup>

<sup>a</sup> Department of Physiology, University of Pennsylvania School of Medicine, 3700 Hamilton Walk, A507 Richards Building, Philadelphia, PA 19104-6085, USA.

<sup>b</sup> Current address: Chosun University School of Medicine, Department of Cellular and Molecular Medicine, Gwangju, Korea.

### Footnotes:

\* Corresponding author.

*E-mail address:* [droberto@mail.med.upenn.edu](mailto:droberto@mail.med.upenn.edu)

Roberto Dominguez

Department of Physiology, University of Pennsylvania School of Medicine, 3700 Hamilton Walk, A507 Richards Building, Philadelphia, PA 19104-6085, USA.

Tel.: 1-215-573-4559; Fax : 1-215-573-5851

RAB28[INP\_004240] 1-----MSDSEESQDRQLKIVLIGDGTSGKTSLTTGFAQE--TF--GKQYKQTIQLDFL51  
RAB1A[INP\_004152] 1-----MSMNP EYD-YLFKLLLI GDSGVGKSSCLLRFADD--TY--TESYI STIGVDFK1 47  
RAB1B[INP\_112243] 1-----MNP EYD-YLFKLLLI GDSGVGKSSCLLRFADD--TY--TESYI STIGVDFK1 47  
RAB2A[INP\_002856] 1-----MAYA-YLFKYLII GDTGVGKSSCLLQFTDK--RF--QPVHDLTIGVEFGA 45  
RAB2B[INP\_116235] 1-----MTYA-YLFKYLII GDTGVGKSSCLLQFTDK--RF--QPVHDLTIGVEFGA 45  
RAB3A[INP\_002857] 1-----MASATDSRYGQKESSDQNF--YMFKILII GNSVVGKTSFLRYADD--SF--TPAFVSTVGI DFKV 61  
RAB3B[INP\_002858] 1-----MASVTDGKTGVKDDASDQNF--YMFKLLII GNSVVGKTSFLRYADD--TF--TPAFVSTVGI DFKV 61  
RAB3C[INP\_612462] 1-----MRHEAPMQMASQADARYGQKDS SDQNF--YMFKLLII GNSVVGKTSFLRYADD--SF--TSAFVSTVGI DFKV 69  
RAB3D[INP\_004274] 1-----MASAGDTPQAGPRDAADQNF--YMFKLLII GNSVVGKTSFLRYADD--SF--TPAFVSTVGI DFKV 61  
RAB4A[INP\_004569] 1-----MSQTAMS ETYD-FLFKFLVI GNACTGKSSCLLHQFIEK--KF--KDDSNHTIGVEFGS 52  
RAB4B[INP\_057238] 1-----MAETYD-FLFKFLVI GSAGTGSCLLHQFIEK--KF--KDDSNHTIGVEFGS 47  
RAB5A[INP\_004153] 1-----MASRGTARPNGPNTGNKIQCFKLVLLGESAVGKSSVLRVFKG--QF--HEFQESTIGAAFLT 59  
RAB5B[INP\_002859] 1-----MTRSTARPNQGPQASKIQCFKLVLLGESAVGKSSVLRVFKG--QF--HEFQESTIGAAFLT 59  
RAB5C[INP\_958842] 1-----MAGRGAARPNAGNKKIQCFKLVLLGESAVGKSSVLRVFKG--QF--HEFQESTIGAAFLT 60  
RAB5C[INP\_004574] 1-----MAGRGAARPNAGNKKIQCFKLVLLGESAVGKSSVLRVFKG--QF--HEFQESTIGAAFLT 60  
RAB6A[INP\_002860] 1-----MSTGGDFGNPLRKFVFLGEGSVAKTSLITRFMYD--SF--DNTYQATIGIDFLS 52  
RAB6A[INP\_942599] 1-----MSTGGDFGNPLRKFVFLGEGSVAKTSLITRFMYD--SF--DNTYQATIGIDFLS 52  
RAB6B[INP\_057661] 1-----MSAGGDFGNPLRKFVFLGEGSVAKTSLITRFMYD--SF--DNTYQATIGIDFLS 52  
RAB6C[INP\_115520] 1-----MTRSKKYLKVIILGDSGVGKSSLMNQYVNK--KF--SNOYKATIGADFLT 47  
RAB7[INP\_004628] 1-----MNP RKKVLDKLIIVGAI VGKTSLPHQYVHK--TF--YEEYQITLGASJLS 47  
RAB7B[INP\_796377] 1-----MAKTYD-YLFKLLII GDSGVGKTSCLLRFSEED--AF--NTFISTIGIDFK1 47  
RAB8A[INP\_005361] 1-----MAKTYD-YLFKLLII GDSGVGKTSCLLRFSEED--AF--NTFISTIGIDFK1 47  
RAB8B[INP\_057614] 1-----MAGKSSLFKVIILGDSGVGKSSLMNRYVTN--KF--DTQLFHTIGVEFLN 46  
RAB9A[INP\_004242] 1-----MAGKSSLFKVIILGDSGVGKSSLMNRYVTN--KF--DTQLFHTIGVEFLN 46  
RAB9B[INP\_057454] 1-----MAKKTVDY-LFKVLLI GDSGVGKSNLRSFTRN--EF--NLESKSTIGVEFAT 50  
RAB10[INP\_057215] 1-----MGRDDEYD-YLFKVLLI GDSGVGKSNLRSFTRN--EF--NLESKSTIGVEFAT 50  
RAB11[INP\_004654] 1-----MGRDDEYD-YLFKVLLI GDSGVGKSNLRSFTRN--EF--NLESKSTIGVEFAT 50  
RAB11B[INP\_004209] 93 P HACMDP GAALQRRRAAGGGGLGAGSPALSGGQRRRKP RPAD-FKLOVILII GSRGVGKTSLMEFTDD--TF--CEACKTIGVDFK1 177  
RAB12[INP\_113967] 1-----MAKAYD-HLFLKLLI GDSGVGKTSCLIRFAED--NF--NNTYI STIGIDFK1 47  
RAB13[INP\_002861] 1-----MATAPYNS-YIFKYLII GDMVGKSSCLLHQFTTEK--KF--MADCPHTIGVEFGT 50  
RAB14[INP\_057406] 1-----MAQYD-VLFRLLI GDSGVGKTSCLLRFADD--EF--HSSHLSTIGVDFKM 47  
RAB15[INP\_941959] 1-----MAQHRTPQRPADYVFKVLLI GDSGVGKSSLLRFTDN--DF--KSLIPTVGCARFV 57  
RAB17[INP\_071894] 1-----MAQHRTPQRPADYVFKVLLI GDSGVGKSSLLRFTDN--DF--KSLIPTVGCARFV 57  
RAB18[INP\_067075] 1-----MDEDLV-TTLKLLII GDSGVGKSSLLRFTDN--DF--KSLIPTVGCARFV 57  
RAB21[INP\_055814] 1-----MAAGCGGGGAAAGRAYSFKVVLLGCECGVCKTSLVLRYCN--KF--NDKHITTLQOASFLT 58  
RAB22[INP\_065724] 1-----MALRELKCVLLGDTGVGKSSIVRFEED--SF--DPNINPTIGASFMT 44  
RAB22[INP\_065724] 1-----MLEEDME-VAILKMWVVGNGAVGKSSIMQRYCKG--IF--TKDYKTI GVDLFE 48  
RAB23[INP\_057361] 1-----MSGQRVDVKVVMKCKEYVGTSLVRYVHD--RF--LVGPYQNTIGAIFA 47  
RAB24[IAAH21263] 1-----MNGT EEDYN-FVFKVLLI GDSGVGKSNLRSFTRN--EF--SHDRTTIGVEFST 51  
RAB25[IAAH3322] 18 ST LP TANGARPARSGTALSGDPARPNGP LQPGRP S LGGGVDFYD-VAFKVMLV GDSGVGKTSCLLRFKIDG--AF--LAGTFISTVGI DFRN 103  
RAB26[INP\_055168] 1-----MSDGYD-YLIFKFLV GDSGVGKTSVLYQYTDG--KF--NSKFIITVGI DFR 48  
RAB27[INP\_899059] 1-----MTDGYD-YLILKLLA GDSGVGKTSFLRYFTDN--KF--NPKFIITVGI DFR 48  
RAB27B[INP\_004154] 1-----MSMEDYD-FLFKVLLI GNAVGKTSCLVRRFTDQ--LF--PPGQCATIGVDFM1 48  
RAB30[INP\_055303] 1-----MMAIRELKVLLIGDGVGKSSIVCRFVDD--HF--DHNISPTIGASFMT 45  
RAB31[INP\_006859] 1-----MAGCGAGDPGLGAAAPAPETREHLFKVLI GELGVGKTSIKRYVHQ--LF--SQHRATIGVDFAL 64  
RAB32[INP\_006825] 1-----MAQPI LCHGSLQPAASAGLASLELDSLDQYD IRIFKIIVIGDSNVGKTSCLLRFKCGG--TF--PDKTEATIGVDFRE 75  
RAB33[INP\_004785] 1-----MAEMESSLEASAFSSGAVSGASGLPPARSRIKIIIVIGDSNVGKTSCLLRFKCGG--RF--PDRTEATIGVDFRE 72  
RAB33B[INP\_112886] 6 P VRRDRVLAELPQCLRKEAALHGKHD FHPRVTCACQEHRTGTGVFKSIIIV GDL SVGKTSCLINRFCKD--TF--DKNYKATIGVDFEM 91  
RAB34[INP\_114140] 1-----MARDYD-HLFLKLLI GDSGVGKSSLLRFADN--TF--SGSYITTI GVDFK1 47  
RAB35[INP\_006851] 1-----MARDYD-HLFLKLLI GDSGVGKSSLLRFADN--TF--SGSYITTI GVDFK1 47  
RAB36[INP\_004905] 77 P VSRDRV IASFRKWYTP EACLQ LREHFHGQVSAACQRNTGTVGLKSVVV GDLVYVGTSLIHRFKCN--VF--DRDYKATIGVDFE1 162  
RAB37[INP\_783865] 1-----MDLQRPDSYQGGAGP DFNHVLKHTLLV GDSGVGKTSVLYQFDQK--KF--IPGSFATVGI GFTN 62  
RAB38[INP\_071732] 1-----MQAPHK EHL YKLLVI GDLGVGKTSIKRYVHQ--NF--SHYRATIGVDFAL 48  
RAB39[INP\_059986] 1-----MEIWI-YQFRLIIVIGDSTVGKSSCLLHRTQG--RF--PGLRSPADPTVGVDF 51  
RAB39B[INP\_741995] 1-----MSAPGSPDQAYD-FLKFLV GDRDVGKSEILESLODG--AA--ESPYSHLGGIDYKT 53  
RAB40A[INP\_543155] 1-----MSALGSPVRAVD-FLKFLV GDRDVGKSEILESLODG--AA--ESPYSHLGGIDYKT 53  
RAB40B[INP\_006813] 1-----MGSQGS P V KSYD-YLLKFLV GDSDVGKCEILASLDG--AA--ESPYAY SNGIDYKT 53  
RAB40C[INP\_066991] 1-----MAGP GP GP DQEQYD-FLKFLV GDA SVGKTSVQRFKTDG--AF--SEROGTTIGVDF 57  
RAB43[INP\_940892] 1-----MGSRD-HLFLKVLV GDAAVGKTSLVQRYSD--SF--SKHYKTVGVDFAL 46  
RAB71[INP\_003920] 1-----MVKLAKCII LADPAVGRK TALAQIFRISDGAHE---OKSYTITITIGMDI VV 45  
RABL4[INP\_006851]

P-loop

Switch I

RAB28[INP\_004240] TLRPGLNVTLQIWDI **GGQ**TIIGC-KMLDKYIYGAQ GVLVLYDITNYQSFENLEDWYTVYVKKVSSESE-TQP LVALVGNKID 132  
 RAB1A[INP\_004152] ELD-GKTIKLIQIWDI **AGQ**ERFR-TITSSYYRGAHGIIVVYDVTQDESYANVKKQWLQEI DRYAS-EN---VNKLLVGNKSD 127  
 RAB1B[INP\_112243] ELD-GKTIKLIQIWDI **AGQ**ESFR-TITSSYYRGAHGIIVVYDVTQDESYANVKKQWLQEI DRYAS-EN---VNKLLVGNKSD 124  
 RAB2A[INP\_002856] TID-GKQIKLIQIWDI **AGQ**ESFR-SITRSYRGAAGALLVYDITRRDIFNHLTQWLEDARQHSN-SN---MVMIMLIGNKSD 122  
 RAB2B[INP\_116235] NID-GKQIKLIQIWDI **AGQ**ESFR-SITRSYRGAAGALLVYDITRRDIFNHLTQWLEDARQHS-SN---MVMIMLIGNKSD 122  
 RAB3A[INP\_002857] YRN-DKRIKLIQIWDI **AGQ**ERYR-TITTAAYRGAHCFILMYDITNEESFNVAQDWTQIKTYSW--DN---AQLVGNKCD 138  
 RAB3B[INP\_002858] YRN-DKRIKLIQIWDI **AGQ**ERYR-TITTAAYRGAHCFILMYDITNEESFNVAQDWTQIKTYSW--DN---AQLVGNKCD 138  
 RAB3C[INP\_612462] FKN-EKRIKLIQIWDI **AGQ**ERYR-TITTAAYRGAHCFILMYDITNEESFNVAQDWTQIKTYSW--DN---AQLVGNKCD 146  
 RAB3D[INP\_004274] YRH-DKRIKLIQIWDI **AGQ**ERYR-TITTAAYRGAHCFILMYDITNEESFNVAQDWTQIKTYSW--DN---AQLVGNKCD 138  
 RAB4A[INP\_004569] NVG-CKYVKLIQIWDI **AGQ**ERFR-SVTRSYRGAAGALLVYDITSRETYNALTNWLTARMLAS-QN---IVILCGNKKD 129  
 RAB4B[INP\_005238] NVG-GKTVKLIQIWDI **AGQ**ERFR-SVTRSYRGAAGALLVYDITSRETYNALTNWLTARMLAS-QN---IVILCGNKKD 124  
 RAB5A[INP\_004153] CLD-DTTVKFEIWDI **AGQ**ERYH-SLAPMYRGAQAAIIVYDITNQETFARAKTWKELQKQAS-PN---IVIALSGNKAD 136  
 RAB5B[INP\_002859] CLD-DTTVKFEIWDI **AGQ**ERYH-SLAPMYRGAQAAIIVYDITNQETFARAKTWKELQKQAS-PN---IVIALSGNKAD 136  
 RAB5C[INP\_958842] CLD-DTTVKFEIWDI **AGQ**ERYH-SLAPMYRGAQAAIIVYDITNQETFARAKTWKELQKQAS-PN---IVIALSGNKAD 137  
 RAB5D[INP\_004574] CLD-DTTVKFEIWDI **AGQ**ERYH-SLAPMYRGAQAAIIVYDITNQETFARAKTWKELQKQAS-PN---IVIALSGNKAD 137  
 RAB6A[INP\_002860] YLE-DRTVRLQIWDI **AGQ**ERFR-SLIPSYIRDSTVAVVYDITNVNSFQQTQKIIDVYTERG-SD---VIMLVGNKTD 129  
 RAB6B[INP\_942599] YLE-DRTVRLQIWDI **AGQ**ERFR-SLIPSYIRDSTVAVVYDITNVNSFQQTQKIIDVYTERG-SD---VIMLVGNKTD 129  
 RAB6C[INP\_115520] YLE-DRTVRLQIWDI **AGQ**ERFR-SLIPSYIRDSTVAVVYDITNVNSFQQTQKIIDVYTERG-SD---VIMLVGNKTD 129  
 RAB7[INP\_004628] MVD-DRLVTMQIWDI **AGQ**ERFR-SLIPSYIRDSTVAVVYDITNVNSFQQTQKIIDVYTERG-SD---VIMLVGNKTD 128  
 RAB7B[INP\_796377] LG-DTTLKLIQIWDI **AGQ**ERFR-SMSTYRGAAGALLVYDITNKSFDNIKNIRNIEHAS-SD---VERMILGNKCD 124  
 RAB8A[INP\_005361] ELD-GKRIKLIQIWDI **AGQ**ERFR-TITTAAYRGAHCFILMYDITNKSFDNIKNIRNIEHAS-SD---VERMILGNKCD 124  
 RAB8B[INP\_057614] ELD-GKRIKLIQIWDI **AGQ**ERFR-TITTAAYRGAHCFILMYDITNKSFDNIKNIRNIEHAS-SD---VERMILGNKCD 124  
 RAB9A[INP\_004242] EVD-GHFVTMQIWDI **AGQ**ERFR-SLRTPFYRGAAGALLVYDITNKSFDNIKNIRNIEHAS-SD---VERMILGNKCD 127  
 RAB9B[INP\_057454] EVD-CRFVTLQIWDI **AGQ**ERFR-SLRTPFYRGAAGALLVYDITNKSFDNIKNIRNIEHAS-SD---VERMILGNKCD 127  
 RAB10[INP\_057215] ELQ-GKIKLIQIWDI **AGQ**ERFR-TITTAAYRGAHCFILMYDITNKSFDNIKNIRNIEHAS-SD---VERMILGNKCD 125  
 RAB11A[INP\_004654] QVD-GKTIKLIQIWDI **AGQ**ERYR-AITSAAYRGAAGALLVYDITNKSFDNIKNIRNIEHAS-SD---VERMILGNKCD 127  
 RAB11B[INP\_004209] QVD-GKTIKLIQIWDI **AGQ**ERYR-AITSAAYRGAAGALLVYDITNKSFDNIKNIRNIEHAS-SD---VERMILGNKCD 127  
 RAB12[INP\_113967] ELR-GKKIKLIQIWDI **AGQ**ERFR-TITTAAYRGAHCFILMYDITNKSFDNIKNIRNIEHAS-SD---VERMILGNKCD 124  
 RAB13[INP\_002861] DLE-GKKIKLIQIWDI **AGQ**ERFR-TITTAAYRGAHCFILMYDITNKSFDNIKNIRNIEHAS-SD---VERMILGNKCD 124  
 RAB14[INP\_057406] EVS-GQIKLIQIWDI **AGQ**ERFR-AVTRSYRGAAGALLVYDITRSTYHNSLSWLTARNLTN-PN---TVILIGNKAD 127  
 RAB15[INP\_941959] EVD-GIKVRQIWDI **AGQ**ERYQ-TITKQYRRAQGIIFLYDITNKSFDNIKNIRNIEHAS-SD---VERMILGNKCD 125  
 RAB17[INP\_071894] DVG-ATSKLEIWDI **AGQ**EKYL-SVCHLYRGAAGALLVYDITRKSDFLKAQWLKDEELHPGE---VLMVGNKTD 135  
 RAB18[INP\_067075] SVD-GNKAKLAIWDI **AGQ**ERFR-TLPSYRGAAGALLVYDITRKSDFLKAQWLKDEELHPGE---VLMVGNKTD 135  
 RAB21[INP\_055814] NIC-CKRVNLAIWDI **AGQ**ERFR-ALGPIYRDSNGAILVYDITDEDSFQVKNWVWELRKLMLG-NE---ICLCVGNKID 135  
 RAB22A[INP\_065724] QYQ-NEHLKLIWDI **AGQ**ERFR-ALAPMYRGAAGALLVYDITRSTYHNSLSWLTARNLTN-PN---TVILIGNKAD 127  
 RAB22B[INP\_057611] QVN-DEDLRLMLWDI **AGQ**EFD-AITKAYYRGAAGALLVYDITRSTYHNSLSWLTARNLTN-PN---TVILIGNKAD 124  
 RAB24[IAH21263] SVG-DRTVTLGIWDI **AGS**ERYE-AMSRYYRGAAGALLVYDITDSSSFERAKFWKELRSLEG---COIYLCGTGKSD 123  
 RAB25[IAH3322] MLG-TAAVKAQIWDI **AGL**ERYR-AITSAAYRGAAGALLVYDITRKSDFLKAQWLKDEELHPGE---VLMVGNKTD 138  
 RAB26[INP\_055168] DVD-CVKVKLQMWDT **AGQ**ERFR-SVTHAYRDAHALLVYDITNKASFDNIQAWLTEIHEYAQ-HD---VALMLGNKSD 120  
 RAB27A[INP\_899059] KRVVYRASGPDGATGRGQRIHLQIWDI **AGQ**ERFR-SLTAFRDAHALLVYDITNKASFDNIQAWLTEIHEYAQ-HD---VALMLGNKSD 120  
 RAB27B[INP\_004154] KRVVYNAQCPNCGSSGKAFKVLQIWDI **AGQ**ERFR-SLTAFRDAHALLVYDITNKASFDNIQAWLTEIHEYAQ-HD---VALMLGNKSD 120  
 RAB30[INP\_055303] EIN-GEKVKLIQIWDI **AGQ**ERFR-SITQSYRGAAGALLVYDITCEESFRCLPWLREIEQYASNK---VITVLVGNKID 125  
 RAB31[INP\_006859] PCG-NEHLKLIWDI **AGQ**ERFR-SLAPMYRGAAGALLVYDITKQDSFYTLKWKVLEKEHGP-EN---IVMAIAGNKKD 146  
 RAB32[INP\_006825] NWDSTRTLVRLQIWDI **AGQ**ERFR-SLAPMYRGAAGALLVYDITKQDSFYTLKWKVLEKEHGP-EN---IVMAIAGNKKD 146  
 RAB33A[INP\_004785] EIE-GEKIKVQIWDI **AGQ**ERFR-SMVEHYRNVHAVVYDITKMTSFTNLKMWIECKNGHAYVP-L---VPKVLVGNKCD 154  
 RAB33B[INP\_112586] EID-GERIKIQLWDT **AGQ**ERFR-FRKSVMQHYRNVHAVVYDITKMTSFTNLKMWIECKNGHAYVP-L---VPKVLVGNKCD 154  
 RAB34[INP\_114140] EVL-GIPFSLQIWDI **AGQ**ERFR-CIASTYRGAQAIIVFNLNDVASLEHTKQWLADALKEKNDP-S---VLLFLVGSKKD 169  
 RAB35[INP\_006852] EIN-GEKVKLIQIWDI **AGQ**ERFR-TITTAAYRGAHCFILMYDITNKASFDNIQAWLTEIHEYAQ-HD---VALMLGNKSD 120  
 RAB36[INP\_004905] TVD-GVRVLIQIWDI **AGQ**ERFR-CIASAYRGAQAIIVFNLNDVASLEHTKQWLADALKEKNDP-S---VLLFLVGSKKD 169  
 RAB37[INP\_783865] TAD-GVRVLIQIWDI **AGQ**ERFR-SVTHAYRDAHALLVYDITNKASFDNIQAWLTEIHEYAQ-HD---VALMLGNKSD 139  
 RAB38[INP\_071732] HMDPETVRLQIWDI **AGQ**ERFR-NMTRVYRKEAFVAFVFDISRSSTFEAVLKWKSDLSKVLHPNGSP IPAVLLANKCD 146  
 RAB39A[INP\_059986] EIEPGRKIKLIQIWDI **AGQ**ERFR-SITRSYRGAAGALLVYDITNRSSFHVKDWLEEAQMYVQPF-R---VFLVLVGHKCD 130  
 RAB39B[INP\_741995] EIEPGRKIKLIQIWDI **AGQ**ERFR-SITRSYRGAAGALLVYDITNRSSFHVKDWLEEAQMYVQPF-R---VFLVLVGHKCD 130  
 RAB40A[INP\_543155] LLD-GQRVKLIQIWDI **SCQ**GRFC-TIFRSYRGAQCVILVYDIANRWSFEGMDRWIKIEEHAP-G---VPKILVGNRLLH 129  
 RAB40B[INP\_006813] LLD-GQRVKLIQIWDI **SCQ**GRFC-TIFRSYRGAQCVILVYDIANRWSFEGMDRWIKIEEHAP-G---VPKILVGNRLLH 129  
 RAB41[INP\_940892] LLD-GRRVLELQIWDI **SSQ**GRFC-TIFRSYRGAQCVILVYDIANRWSFEGMDRWIKIEEHAP-G---VPKILVGNRLLH 129  
 RAB43[INP\_940892] EIQ-GKRVKLIQIWDI **AGQ**ERFR-TITQSYRGAAGALLVYDITRKSDFLSPVHWIEDVRKYAG-SN---IVQLLIGNKSD 134  
 RAB71[INP\_003920] QWSDYEIVRLQIWDI **AGQ**ERFR-SMTRLVYRDAACVIMFDVNTNATTFNSQKQDLSDSKLTPNCGEPVPCLLANKCD 128  
 RABL4[INP\_006851] PVPDTGDSVELFI **FD**SAKLELS-EMLDKLEWESPVLVCLVYDVTNEESFNKCSKWLKARSAQAPGIS---LPQVLYVGNKTD 125

Switch II

RAB28[NP\_004240] 133 L--- EHM-RTIKPE-KHLRFQEN-GFSS-HFVSAK---TGDSVFLCFQKVAAEILGICKLNKAEIEQSQRIVRA---EIVKYPE  
RAB1A[NP\_004152] 128 L--- TTK-KVVVDYT-TAKEFADSL-GIPF-LETSAK---NATNVEQSFMTMAAEIKKRMGPATAGAEK-----SNVKIQS  
RAB18[NP\_112243] 125 L--- TTK-KVVVDYT-TAKEFADSL-GIPF-LETSAK---NATNVEQSFMTMAAEIKKRMGPATAGAEK-----SNVKIQS  
RAB2A[NP\_002856] 123 L--- ESR-RVKKKE-EGEAFARH-GLIF-METSAK---TASNVEAFINTAKIYEKIQEGVFINNEA-----NGIKIGP  
RAB21[NP\_116231] 123 L--- ESR-RDVKRE-EGEAFARH-GLIF-METSAK---TASNVEAFINTAKIYEKIQEGVFINNEA-----NGIKIGP  
RAB3A[NP\_002857] 139 M--- EDE-RVVSSE-RCQLADHL-GFEF-FEASAK---DNINVKQTFERLVDVICKEMSEGLTDVHNEA-----TGAKQGP  
RAB38[NP\_002858] 139 M--- EEE-RVVPTE-KGQLAEQL-GFDF-FEASAK---ENISVRQAFERLVDVICKEMSDSLDTPSMLGSS---KNTRLSD  
RAB3C[NP\_612462] 147 M--- EDE-RVISTE-RCQHLCEQL-GFEF-FETSAK---DNINVKQTFERLVDVICKEMSELETDPAI-----TAAKQNT  
RAB3D[NP\_004274] 139 L--- EDE-RVVP AE-DGRFLADDL-GFEF-FEASAK---ENINVKQFERLVDVICKEMSELETDPAI-----TAAKQNT  
RAB4A[NP\_004569] 130 L--- DAD-REVTFL-EASRFAQEN-ELMF-LETSAL---TGENVEAEFLKCAKRTLNKIDSCGLDPERMG---SGIQYGD  
RAB48[NP\_057238] 125 L--- DP-E-REVTFL-EASRFAQEN-ELMF-LETSAL---TGENVEAEFLKCAKRTLNKIDSCGLDPERMG---SGIQYGD  
RAB5A[NP\_004153] 137 L--- ANK-RAVDFO-EAQYAADN-SLFF-METSAK---TSMNVNEIFMAIAKRLPKSEPNLGGAGARS---RGVDLHE  
RAB5B[NP\_002859] 137 L--- ANK-RAVDFO-EAQYAADN-SLFF-METSAK---TSMNVNEIFMAIAKRLPKSEPNLGGAGARS---RGVDLHE  
RAB5C[NP\_958842] 138 L--- ASK-RAVEFO-EAQYAADN-SLFF-METSAK---TAMNVNEIFMAIAKRLPKSEPNLGGAGARS---RGVDLHE  
RAB5C[NP\_004574] 138 L--- ASK-RAVEFO-EAQYAADN-SLFF-METSAK---TAMNVNEIFMAIAKRLPKSEPNLGGAGARS---RGVDLHE  
RAB6A[NP\_002860] 130 L--- ADK-RQVSI-EGERKAKEL-NVMF-IETSAK---AGYNVKQLFRVAALPQMGESTQDRSREDM---IDIKLEK  
RAB6A[NP\_942599] 130 L--- ADK-RQVSI-EGERKAKEL-NVMF-IETSAK---AGYNVKQLFRVAALPQMGESTQDRSREDM---IDIKLEK  
RAB6B[NP\_057661] 130 L--- ADK-RQVSI-EGERKAKEL-NVMF-IETSAK---AGYNVKQLFRVAALPQMGESTQDRSREDM---IDIKLEK  
RAB6C[NP\_115520] 130 L--- ADK-RQVSI-EGERKAKEL-NVMF-IETSAK---AGYNVKQLFRVAALPQMGESTQDRSREDM---IDIKLEK  
RAB7[NP\_004628] 129 L--- EN-ROVATK-RAQAWCYSKNINIPY-FETSAB---EAINVEQAFQTLARNALQOETVELYNEFP---EPICKLDK  
RAB7B[NP\_796377] 128 L--- AD- RKPVE-VAQGWCREK-DIPY-FEVSAB---NDINVQAFEMLASRALRYQSILENHLLT---ESIKLSP  
RAB8A[NP\_005361] 125 V--- NDK-RQVSE-RGCKLALDY-GIKF-METSAB---ANINVEAEFLLARDIIMKAKMDKICENSPQGSN---QGVKITE  
RAB8B[NP\_057614] 125 M--- NDK-RQVSE-RGCKLALDY-GIKF-METSAB---ANINVEAEFLLARDIIMKAKMDKICENSPQGSN---QGVKITE  
RAB9A[NP\_004242] 128 L--- SE-RQVSTE-EAQWCRDNGDYPY-FETSAB---DATNVAAEFAVRRYLATEDRSIDLITQ---DTVNLHR  
RAB9B[NP\_057454] 128 K--- ED-ROVTE-EAQTWCMGNDYPY-FETSAB---DDNTVVAFEAVRQYLAVEQLHECMLG---HTIDLNS  
RAB10[NP\_057215] 126 M--- DDK-RVVPKG-KGGQIAREH-GIRF-FETSAB---ANINIKAKFLAEDILRKTYPKEPNS---ENVDISS  
RAB11[NP\_004654] 128 L--- RHL-RAVPTD-EARAFAEKN-NLSE-IETSAL---DSTNVEAEFKNLTLEIYRIVSQKQIADRAAHDESPGN-NVVDISV  
RAB11B[NP\_004209] 128 L--- RHL-RAVPTD-EARAFAEKN-NLSE-IETSAL---DSTNVEAEFKNLTLEIYRIVSQKQIADRAAHDESPGN-NVVDISV  
RAB12[NP\_113961] 225 C--- ET-DREITRQ-QGKFAQITGMR-FCEASAB---DNFNVDIEFLKLVLDILKMPLDILRNLNSN---SILSLQP  
RAB13[NP\_002861] 125 M--- EAK-RKVQKE-EAKQFAEEN-GLLF-LEASAB---TGENVEDAEFLAARKIYQNIQDGSLDLNAE---SGVQHKP  
RAB14[NP\_057406] 126 L--- EQ-RDVTYE-EAKQFAEEN-GLLF-LEASAB---TGENVEDAEFLAARKIYQNIQDGSLDLNAE---SGVQHKP  
RAB15[NP\_941959] 126 K--- ARRGPDGKAN-ASRKLCLPO---PW-METSAB---HQAQSERVNLGI-LRMLSRNGRWEESKSSWR---RSMAWTS  
RAB17[NP\_071894] 126 L--- SQE-REVTFO-EGKEEADSO-KLFF-METSAB---LNHQVSEFNTVAQELLQORSDDEQALRGD---AAVALNK  
RAB18[NP\_067075] 126 K--- EN-REVDNR-EGKFAARKH-SMLF-I-EASAB---TCDGVQCAFELVEKIIQTPGLWESENQ---KGVKLSH  
RAB21[NP\_055814] 136 L--- EKE-RHVS IQ-EAESYAESV-GAKH-YHTSAB---QNKGI EELFLDLCKRMI-ETAQVDERAKKNGSSQPGTARRGVQIID  
RAB22A[NP\_065724] 122 L--- IDV-REVMER-DAKDYADSI-HAIF-FETSAB---NAININELFIEISRRIPSTDANLPISGG---GFKFLSR  
RAB23[NP\_057361] 125 L--- LDD-SCIKNE-EAEALAKR-LKRF-YRTSAB---EDLNVNEFVLYLAEKYLOK LKQOIAEDPELTHSSSNKIGVFTLSG  
RAB24[AAH21263] 124 LLEDRRRRVDFH-DVQDYADNI-KAQL-FETSAB---TQGSVDELFOKVAEDVSVAAFOYMTED---KQVDLQ  
RAB25[AAH3322] 129 L--- SQA-REVPTE-EARMAEENN-GLLF-LETSAL---DSTNVELAFETVLKELFAKQSMKAPSE---PRFRLHD  
RAB26[NP\_055168] 181 S--- AHE-RVVKRE-DGCKLAKEY-CLPF-METSAB---TGLNVDLAFTAIKELKORSMKAPSE---PRFRLHD  
RAB27A[NP\_899059] 137 L--- AER-REVSRQ-RAEESQAQ-DMYY-LETSAB---ESDNVEKFLDLACRLI SEARQNTLV---NNVSSPL  
RAB27B[NP\_004154] 126 L--- AER-REVSRQ-RAEESQAQ-DMYY-LETSAB---ESDNVEKFLDLACRLI SEARQNTLV---NNVSSPL  
RAB30[NP\_055303] 137 L--- SDI-REVLK-DAK EYAESI-GAIV-VETSAB---NAINIEELFOGSRQIP LDPHENGNN---GTIKVEK  
RAB31[NP\_006859] 147 Q--- NKD-SSQSP S-QVDFCKEH-CFACGFETSAB---DNINIEAARFLVEKILVNHQSPNEENDY---DKIKLDQ  
RAB32[NP\_006825] 152 L--- R EQ- IQVPSN-LALKFADAH-NMPL-L-FETSABKPEESQNSIFMGLACRLKAKQ5LYLRDAERQ---GKVKQLE  
RAB33A[NP\_004785] 155 L--- R SA- IQVPTD-LAQKFAADH-SMPL-L-FETSABKPNNDNDHVEAIFMTLAHKLSHKP LMLSOPD---NGCIIKP  
RAB33B[NP\_112586] 170 L--- STPQAQYALMEKDALQVAQEM-KA EY-WAVS SL---TGENVREFFRVAALTFEANYLAELEKSGARRIG---DVRINS  
RAB34[NP\_114140] 124 D--- P ER-KVETE-DAVKFAGQM-GIQL-FETSAB---ENVNVEEMFNCTIELVLRKADNLAKOQQOQN---DVKLTK  
RAB35[NP\_006852] 241 L--- LSGAAC EQAEADAVHLAREM-QA EY-WSVSAB---TGENVKAFFRVAALAEQSVLQDLERQSSARLQVNGDILQMEG  
RAB36[NP\_004905] 140 M--- SSE-RVIRSE-DGETLAREY-GVPF-LETSAB---TGMNVELAFIAKELKRYRAGHQADE---PSFOIRD  
RAB37[NP\_783865] 131 Q--- CKD-VLMNGLKMDQFEKHEH-GFVGWFETSAB---ENINIDEASRCLVKHII LANECDLMESEIP---DVKVPHL  
RAB38[NP\_071732] 131 L--- ASQ-RQVTRH-EAEKLSADC-GMKY-IETSAB---DATNVEESTITLTRDIYELIYKGEICIQDQW---EGVKSGF  
RAB39A[NP\_059986] 127 L--- DTQ-RQVTRH-EAEKLSADC-GMKY-IETSAB---DAINVEKAFITLTRDIYELIYKGEICIQDQW---EGVKSGF  
RAB39B[NP\_741995] 130 L--- AFK-RQVPR-DAQAYAEERL-GVTF-FEVSPL---CNFNIESFTELARIVLRLHRMNWLGRPS---KVLSLQD  
RAB40A[NP\_543155] 130 L--- AFK-RQVPR-DAQAYAEERL-GVTF-FEVSPL---CNFNIESFTELARIVLRLHRMNWLGRPS---KVLSLQD  
RAB40B[NP\_006813] 130 L--- AFK-RQVPR-DAQAYAEERL-GVTF-FEVSPL---CNFNIESFTELARIVLRLHRMNWLGRPS---KVLSLQD  
RAB40C[NP\_066991] 135 L--- SEL-REVSLA-EAQSLAEHY-DI LCAIETSAB---DSSNV EAEFLRVATELIMRHGGLFSEKSP---DHIQLNS  
RAB43[NP\_940892] 129 L--- SP---WAVSRD-QIDRSKEN-GFTGWTETSAB---ENKNI NEAMRVLIEKMMRNSTEDIMSLSTQ---DYINLQT  
RAB71[NP\_003920] 126 L--- AGR-RAVDSA-EARAWALCO-GLEC-FETSAB---EMENFEAPFHLAKQFHQLYREKV---EVFRALA  
RAB4A[NP\_006851] 185

Supplementary Fig. 1. Alignment of human Rab GTPases. The order of the sequences is according to their numerical classification, except for Rab28, which is shown on top. The accession numbers of the sequences are indicated next to their names. Highly conserved amino acids, based on an overall identity threshold of 90%, are highlighted (blue background). The regions corresponding to the P-loop, switch 1 and switch 2 are boxed red. Phylogenetic analysis of the Rab family suggests that Rab28 is at the periphery of this family [1-3]. Among all the members of the Rab family, only Rab28 and Rab7B (whose structure is still unknown) present a double-glycine motif at the beginning of switch 2 (red). We propose that the presence of the double-glycine motif explains, in part, the large conformational change observed in the switch region of Rab28. The position corresponding to Rab28 Gly70 is typically occupied by Ala in other members of the Rab family, whereas the double-glycine motif is found in members of the Arf GTPase family [2,3]. The alignment was generated with the program MUSCLE [4] and edited with the program Jalview [5].

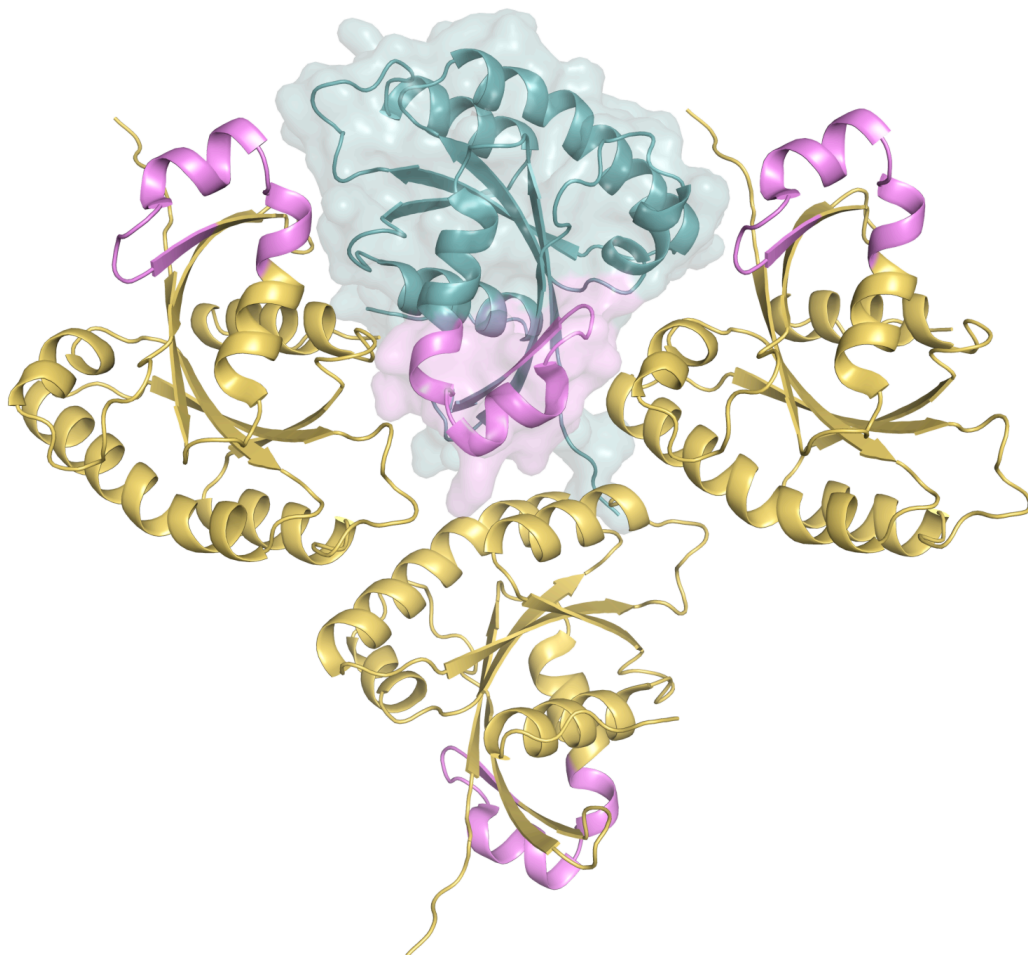

Supplementary Fig. 2. Crystal packing contacts near switch 1 in the structure of GDP-3'P-Rab28. Crystal packing contacts may help stabilize the conformation of switch 1 (pink) in the structure of GDP-3'P-Rab28 (cyan, reference molecule; yellow, symmetry-related molecules).

Supplementary Movie 1. Nucleotide-dependent conformational change in Rab28. The movie illustrates a linear interpolation between the atomic coordinates of the GppNHp-bound and GDP-3'P-bound structures of Rab28. The C $\alpha$ -trace and transparent surface representations are colored according to displacement, using a color ramp from blue (minimum displacement) to red (maximum displacement). Note that the nucleotide moves slightly after hydrolysis, a fact hardly ever noticed but which probably contributes to the conformational change.

**Supplementary Table 1. Structures of Rab GTPases**

| Name      | PDB  | Nucleotide           | Complex                 | Resolution (Å) | Reference           | Comments                           |
|-----------|------|----------------------|-------------------------|----------------|---------------------|------------------------------------|
| h-Rab1A   | 2FOL | GDP                  | No                      | 2.63           | Structural Genomics |                                    |
| cp-Rab1A  | 2RHD | GDP                  | No                      | 2.06           | Structural Genomics |                                    |
| h-Rab2A   | 1Z0A | GDP                  | No                      | 2.12           | [6]                 |                                    |
| r-Rab3A   | 3RAB | GppNHp               | No                      | 2.00           | [7]                 |                                    |
| r-Rab3A   | 1ZBD | GTP                  | rabphilin-3A (effector) | 2.60           | [8]                 |                                    |
| h-Rab3D   | 2GF9 | GDP                  | No                      | 1.53           | Structural Genomics |                                    |
| h-Rab4A   | 1Z0K | GTP                  | Rabenosyn-5 (effector)  | 1.92           | [6]                 | Q67L mutant                        |
| h-Rab4A   | 1YU9 | GppNHp               | No                      | 2.07           | [6]                 |                                    |
| h-Rab5A   | 1N6H | GppNHp               | No                      | 1.51           | [9]                 |                                    |
| h-Rab5A   | 1N6R | GppNHp               | No                      | 1.55           | [9]                 | A30L mutant                        |
| h-Rab5A   | 1N6P | GppNHp               | No                      | 1.54           | [9]                 | A30E mutant                        |
| h-Rab5A   | 1N6O | GppNHp               | No                      | 1.80           | [9]                 | A30K mutant                        |
| h-Rab5A   | 1N6N | GppNHp               | No                      | 1.60           | [9]                 | A30R mutant                        |
| h-Rab5A   | 1N6L | GTP                  | No                      | 1.60           | [9]                 | A30P mutant                        |
| h-Rab5A   | 1N6K | GDP-AIF <sub>3</sub> | No                      | 1.55           | [9]                 | A30P mutant                        |
| h-Rab5A   | 1N6I | GDP                  | No                      | 1.55           | [9]                 | A30P mutant                        |
| h-Rab5A   | 1TU3 | GppNHp               | Rabaptin-5 (effector)   | 2.31           | [9]                 |                                    |
| h-Rab5A   | 1TU4 | GDP                  | No                      | 2.20           | [9]                 | Co <sup>2+</sup> in catalytic site |
| h-Rab5A   | 1R2Q | GppNHp               | No                      | 1.05           | [10]                |                                    |
| m-Rab5C   | 1HUQ | GppNHp               | No                      | 1.80           | [11]                |                                    |
| m-Rab5C   | 1Z07 | GppNHp               | No                      | 1.81           | [6]                 | G55Q mutant                        |
| m-Rab5C   | 1Z0D | GDP                  | No                      | 2.20           | [6]                 |                                    |
| h-Rab6A   | 1YZQ | GppNHp               | No                      | 1.78           | [6]                 |                                    |
| h-Rab6A   | 3BBP | GTP                  | GCC185                  | 3.00           | [12]                | Q72L mutant                        |
| h-Rab6A   | 2GIL | GTP                  | No                      | 1.82           | [13]                | Slow GTPase activity               |
| h-Rab6B   | 2FE4 | GDP                  | No                      | 2.30           | [14]                |                                    |
| pf-Rab6   | 1D5C | GDP                  | No                      | 2.30           | [15]                |                                    |
| h-Rab7A   | 1T91 | GTP                  | No                      | 1.90           | [16]                | Q67L mutant                        |
| h-Rab7A   | 1YHN | GppNHp               | RILP (effector)         | 3.00           | [16]                |                                    |
| r-Rab7A   | 1VG0 | GDP                  | Rab escort protein 1    | 2.20           | [17]                |                                    |
| r-Rab7A   | 1VG9 | GDP                  | Rab escort protein 1    | 2.50           | [17]                |                                    |
| r-Rab7A   | 1VG8 | GppNHp               | No                      | 1.70           | [17]                |                                    |
| r-Rab7A   | 1VG1 | GDP                  | No                      | 1.90           | [17]                |                                    |
| h-Rab8A   | 2FU5 | None                 | MSS4 (GEF)              | 2.00           | [18]                |                                    |
| h-Rab9A   | 1WMS | GDP                  | No                      | 1.25           | [19]                |                                    |
| h-Rab9B   | 2OCB | GppNHp               | No                      | 2.20           | Structural Genomics |                                    |
| m-Rab9A   | 1YZL | GppNHp               | No                      | 1.85           | [6]                 |                                    |
| c-Rab9A   | 1S8F | GDP                  | No                      | 1.77           | [20]                |                                    |
| h-Rab11A  | 1YZK | GppNHp               | No                      | 2.00           | [6]                 |                                    |
| h-Rab11A  | 2GZD | GTP                  | FIP2 (effector domain)  | 2.44           | [21]                | Q70L mutant                        |
| h-Rab11A  | 2GZH | GTP                  | FIP2 (effector domain)  | 2.47           | [21]                | Q70L mutant                        |
| h-Rab11A  | 2HV8 | GTP                  | FIP3 (effector domain)  | 1.86           | [22]                | Q70L mutant                        |
| h-Rab11A  | 2D7C | GTP                  | FIP3 (effector domain)  | 1.75           | [23]                | Q70L mutant                        |
| h-Rab11A  | 1OIX | GDP-Pi               | No                      | 1.70           | [24]                |                                    |
| h-Rab11A  | 1OIW | GTP <sub>γ</sub> S   | No                      | 2.05           | [25]                |                                    |
| h-Rab11A  | 1OIV | GDP                  | No                      | 1.98           | [25]                |                                    |
| pf-Rab11A | 3BFB | GDP                  | No                      | 1.80           | Structural Genomics |                                    |
| h-Rab11B  | 2F9M | GppNHp               | No                      | 1.95           | [26]                |                                    |
| h-Rab11B  | 2F9L | GDP                  | No                      | 1.55           | [26]                |                                    |
| h-Rab12   | 2IL1 | GDP                  | No                      | 2.10           | Structural Genomics |                                    |
| h-Rab14   | 2AED | GDP                  | No                      | 2.30           | Structural Genomics |                                    |
| h-Rab14   | 1Z0F | GDP                  | No                      | 2.15           | [6]                 |                                    |
| h-Rab18   | 1X3S | GppNHp               | No                      | 1.32           | Structural Genomics |                                    |

**Supplementary Table 1 Continued**

|          |      |                      |                        |      |                     |                                      |
|----------|------|----------------------|------------------------|------|---------------------|--------------------------------------|
| h-Rab21  | 1YZT | GppNHp               | No                     | 2.05 | [6]                 |                                      |
| h-Rab21  | 1YZU | GppNHp               | No                     | 2.50 | [6]                 |                                      |
| h-Rab21  | 1Z08 | GppNHp               | No                     | 1.80 | [6]                 | Q53G mutant                          |
| h-Rab21  | 1Z0I | GDP                  | No                     | 2.33 | [6]                 |                                      |
| h-Rab21  | 2OT3 | None                 | VPS9 (GEF domain)      | 2.10 | [26]                |                                      |
| m-Rab22A | 1YVD | GppNHp               | No                     | 1.93 | [6]                 |                                      |
| m-Rab22A | 1Z0J | GTP                  | Rabenosyn-5 (effector) | 1.32 | [6]                 | V22M, Q64L mutants                   |
| m-Rab23  | 1Z22 | GDP                  | No                     | 2.06 | [6]                 |                                      |
| m-Rab23  | 1Z2A | GDP                  | No                     | 1.90 | [6]                 |                                      |
| h-Rab25  | 2OIL | GDP                  | No                     | 2.30 | Structural Genomics |                                      |
| h-Rab26  | 2G6B | GppNHp               | No                     | 2.00 | Structural Genomics |                                      |
| m-Rab27B | 2IEZ | GDP                  | No                     | 2.80 | [27]                | Q78L mutant                          |
| m-Rab27B | 2IF0 | GDP                  | No                     | 2.80 | [27]                | Q78L mutant                          |
| m-Rab27B | 2IEY | GDP                  | No                     | 3.18 | [27]                | Q78L mutant                          |
| h-Rab28  | 2HXS | GDP-3 <sup>o</sup> P | No                     | 1.10 | This work           |                                      |
| h-Rab28  | 3E5H | GppNHp               | No                     | 1.50 | This work           |                                      |
| h-Rab30  | 2EW1 | GppNHp               | No                     | 2.00 | Structural Genomics |                                      |
| h-Rab31  | 2FG5 | GppNHp               | No                     | 2.80 | Structural Genomics |                                      |
| m-Rab33B | 1Z06 | GppNHp               | No                     | 1.81 | [6]                 |                                      |
| m-Rab33B | 2G77 | GDP-AIF <sub>3</sub> | Gyp1 TBC domain (GAP)  | 2.26 | [28]                |                                      |
| h-Rab43  | 2HUP | GDP                  | No                     | 2.05 | Structural Genomics |                                      |
| h-Rab45  | 2P5S | GDP                  | No                     | 2.15 | Structural Genomics | h-RasEF (aa 533-712)                 |
| Sc-Sec4  | 1G16 | GDP                  | No                     | 1.80 | [29]                |                                      |
| Sc-Sec4  | 1G17 | GppNHp               | No                     | 2.00 | [29]                |                                      |
| Sc-Sec4  | 2EQB | Phosphate            | Sec2 GEF domain        | 2.70 | [30]                | PO <sub>4</sub> in nucleotide pocket |
| Sc-Sec4  | 2OCY | None                 | Sec2 GEF domain        | 3.30 | [31]                |                                      |
| Sc-Ypt1  | 1UKV | GDP                  | GDI                    | 1.50 | [32]                |                                      |
| Sc-Ypt1  | 1YZN | GppNHp               | No                     | 2.06 | [6]                 |                                      |
| Sc-Ypt7  | 1KY2 | GppNHp               | No                     | 1.60 | [33]                |                                      |
| Sc-Ypt7  | 1KY3 | GDP                  | No                     | 1.35 | [33]                |                                      |
| Sc-Ypt51 | 1EK0 | GppNHp               | No                     | 1.48 | [34]                |                                      |

h, human; r, rat; m, mouse; c, canine; Sc, *Saccharomyces cerevisiae*; pf, *Plasmodium falciparum*; cp, *cryptosporidium parvum*



**Supplementary Table 2. Structures of Arf GTPases**

| Name    | PDB  | Nucleotide         | Complex                | Resolution (Å) | Reference           | Comments                   |
|---------|------|--------------------|------------------------|----------------|---------------------|----------------------------|
| r-Arf1  | 1RRF | GDP                | No                     | 3.00           | [35]                |                            |
| r-Arf1  | 1RRG | GDP                | No                     | 2.40           | [35]                |                            |
| b-Arf1  | 1R8S | GDP                | Sec7 (GEF domain)      | 1.46           | [36]                | Sec7 catalytic E->K mutant |
| b-Arf1  | 1R8Q | GDP-3'P            | Sec7 (GEF domain)      | 1.86           | [36]                | With inhibitor brefeldin A |
| b-Arf1  | 1S9D | GDP                | Sec7 (GEF domain)      | 1.80           | [36]                | With inhibitor brefeldin A |
| h-Arf1  | 1RE0 | GDP                | Sec7 (GEF domain)      | 2.40           | [37]                | With inhibitor brefeldin A |
| m-Arf1  | 1J2J | GTP                | GGA1 fragment          | 1.60           | [38]                | Q71L mutant                |
| m-Arf1  | 1O3Y | GTP                | No                     | 1.50           | [38]                | Q71L mutant                |
| m-Arf1  | 2J59 | GTP                | ARHGAP21 (GAP)         | 2.10           | [39]                |                            |
| h-Arf1  | 1U81 | GDP                | No                     | NMR            | [40]                |                            |
| Sc-Arf1 | 1MOZ | GDP                | No                     | 3.17           | [41]                | Also known as ARL1         |
| Sc-Arf2 | 1MR3 | GDP-3'P            | No                     | 1.60           | [41]                |                            |
| h-Arf4  | 1Z6X | GDP                | No                     | 2.70           | Structural Genomics |                            |
| h-Arf5  | 2B6H | GDP                | No                     | 1.76           | Structural Genomics |                            |
| h-Arf6  | 2J5X | GTP <sub>γ</sub> S | No                     | 2.80           | [42]                |                            |
| h-Arf6  | 1E0S | GDP                | No                     | 2.28           | [43]                |                            |
| h-Arf6  | 2A5D | GTP                | Cholera toxin A1       | 1.80           | [44]                |                            |
| h-Arf6  | 2A5F | GTP                | Cholera toxin A1       | 2.02           | [44]                |                            |
| h-Arf6  | 2A5G | GTP                | Cholera toxin A1       | 2.66           | [44]                | Q67L mutant                |
| h-SAR1a | 2GAO | GDP                | No                     | 2.00           | Structural Genomics |                            |
| Ch-SAR1 | 2FA9 | GDP                | No                     | 2.50           | [45]                | Not in PubMed              |
| Ch-SAR1 | 1F6B | GDP                | No                     | 1.70           | [46]                |                            |
| Ch-SAR1 | 2FMX | GDP                | No                     | 1.82           | [45]                |                            |
| Sc-SAR1 | 1M2O | GppNHp             | Sec23                  | 2.50           | [47]                |                            |
| Sc-SAR1 | 2QTV | GppNHp             | Sec23 and Sec31 domain | 2.50           | [48]                |                            |
| h-Arf5  | 1ZJ6 | GDP-3'P            | No                     | 2.00           | [49]                |                            |

h, human; r, rat; m, mouse; b, bovine; Sc, *Saccharomyces cerevisiae*, Ch, Chinese hamster

## Supplementary References

- [1] Pereira-Leal, J.B. and Seabra, M.C. (2000). The mammalian Rab family of small GTPases: definition of family and subfamily sequence motifs suggests a mechanism for functional specificity in the Ras superfamily. *J Mol Biol* 301, 1077-87.
- [2] Colicelli, J. (2004). Human RAS superfamily proteins and related GTPases. *Sci STKE* 2004, RE13.
- [3] Wennerberg, K., Rossman, K.L. and Der, C.J. (2005). The Ras superfamily at a glance. *J Cell Sci* 118, 843-6.
- [4] Edgar, R.C. (2004). MUSCLE: multiple sequence alignment with high accuracy and high throughput. *Nucleic Acids Res* 32, 1792-7.
- [5] Clamp, M., Cuff, J., Searle, S.M. and Barton, G.J. (2004). The Jalview Java alignment editor. *Bioinformatics* 20, 426-7.
- [6] Eathiraj, S., Pan, X., Ritacco, C. and Lambright, D.G. (2005). Structural basis of family-wide Rab GTPase recognition by rabenosyn-5. *Nature* 436, 415-9.
- [7] Dumas, J.J., Zhu, Z., Connolly, J.L. and Lambright, D.G. (1999). Structural basis of activation and GTP hydrolysis in Rab proteins. *Structure* 7, 413-23.
- [8] Ostermeier, C. and Brunger, A.T. (1999). Structural basis of Rab effector specificity: crystal structure of the small G protein Rab3A complexed with the effector domain of rabphilin-3A. *Cell* 96, 363-74.
- [9] Zhu, G., Liu, J., Terzyan, S., Zhai, P., Li, G. and Zhang, X.C. (2003). High resolution crystal structures of human Rab5a and five mutants with substitutions in the catalytically important phosphate-binding loop. *J Biol Chem* 278, 2452-60.
- [10] Terzyan, S., Zhu, G., Li, G. and Zhang, X.C. (2004). Refinement of the structure of human Rab5a GTPase domain at 1.05 Å resolution. *Acta Crystallogr D Biol Crystallogr* 60, 54-60.
- [11] Merithew, E., Hatherly, S., Dumas, J.J., Lawe, D.C., Heller-Harrison, R. and Lambright, D.G. (2001). Structural plasticity of an invariant hydrophobic triad in the switch regions of Rab GTPases is a determinant of effector recognition. *J Biol Chem* 276, 13982-8.
- [12] Burguete, A.S., Fenn, T.D., Brunger, A.T. and Pfeffer, S.R. (2008). Rab and Arl GTPase family members cooperate in the localization of the golgin GCC185. *Cell* 132, 286-98.
- [13] Bergbrede, T., Pylypenko, O., Rak, A. and Alexandrov, K. (2005). Structure of the extremely slow GTPase Rab6A in the GTP bound form at 1.8Å resolution. *J Struct Biol* 152, 235-8.
- [14] Garcia-Saez, I., Tcherniuk, S. and Kozielski, F. (2006). The structure of human neuronal Rab6B in the active and inactive form. *Acta Crystallogr D Biol Crystallogr* 62, 725-33.
- [15] Chattopadhyay, D., Smith, C.D., Barchue, J. and Langsley, G. (2000). Plasmodium falciparum rab6 GTPase: expression, purification, crystallization and preliminary crystallographic studies. *Acta Crystallogr D Biol Crystallogr* 56, 1017-9.
- [16] Wu, M., Wang, T., Loh, E., Hong, W. and Song, H. (2005). Structural basis for recruitment of RILP by small GTPase Rab7. *Embo J* 24, 1491-501.
- [17] Rak, A., Pylypenko, O., Niculae, A., Pyatkov, K., Goody, R.S. and Alexandrov, K. (2004). Structure of the Rab7:REP-1 complex: insights into the mechanism of Rab prenylation and choroideremia disease. *Cell* 117, 749-60.
- [18] Itzen, A., Pylypenko, O., Goody, R.S., Alexandrov, K. and Rak, A. (2006). Nucleotide exchange via local protein unfolding--structure of Rab8 in complex with MSS4. *Embo J* 25, 1445-55.
- [19] Chen, L., DiGiammarino, E., Zhou, X.E., Wang, Y., Toh, D., Hodge, T.W. and Meehan, E.J. (2004). High resolution crystal structure of human Rab9 GTPase: a novel antiviral drug target. *J Biol Chem* 279, 40204-8.

- [20] Wittmann, J.G. and Rudolph, M.G. (2004). Crystal structure of Rab9 complexed to GDP reveals a dimer with an active conformation of switch II. *FEBS Lett* 568, 23-9.
- [21] Jagoe, W.N., Lindsay, A.J., Read, R.J., McCoy, A.J., McCaffrey, M.W. and Khan, A.R. (2006). Crystal structure of rab11 in complex with rab11 family interacting protein 2. *Structure* 14, 1273-83.
- [22] Eathiraj, S., Mishra, A., Prekeris, R. and Lambright, D.G. (2006). Structural basis for Rab11-mediated recruitment of FIP3 to recycling endosomes. *J Mol Biol* 364, 121-35.
- [23] Shiba, T., Koga, H., Shin, H.W., Kawasaki, M., Kato, R., Nakayama, K. and Wakatsuki, S. (2006). Structural basis for Rab11-dependent membrane recruitment of a family of Rab11-interacting protein 3 (FIP3)/Arfophilin-1. *Proc Natl Acad Sci U S A* 103, 15416-21.
- [24] Pasqualato, S. and Cherfils, J. (2005). Crystallographic evidence for substrate-assisted GTP hydrolysis by a small GTP binding protein. *Structure* 13, 533-40.
- [25] Pasqualato, S., Senic-Matuglia, F., Renault, L., Goud, B., Salamero, J. and Cherfils, J. (2004). The structural GDP/GTP cycle of Rab11 reveals a novel interface involved in the dynamics of recycling endosomes. *J Biol Chem* 279, 11480-8.
- [26] Scapin, S.M., Carneiro, F.R., Alves, A.C., Medrano, F.J., Guimaraes, B.G. and Zanchin, N.I. (2006). The crystal structure of the small GTPase Rab11b reveals critical differences relative to the Rab11a isoform. *J Struct Biol* 154, 260-8.
- [27] Chavas, L.M. et al. (2007). Structure of the small GTPase Rab27b shows an unexpected swapped dimer. *Acta Crystallogr D Biol Crystallogr* 63, 769-79.
- [28] Pan, X., Eathiraj, S., Munson, M. and Lambright, D.G. (2006). TBC-domain GAPs for Rab GTPases accelerate GTP hydrolysis by a dual-finger mechanism. *Nature* 442, 303-6.
- [29] Stroupe, C. and Brunger, A.T. (2000). Crystal structures of a Rab protein in its inactive and active conformations. *J Mol Biol* 304, 585-98.
- [30] Sato, Y., Fukai, S., Ishitani, R. and Nureki, O. (2007). Crystal structure of the Sec4p.Sec2p complex in the nucleotide exchanging intermediate state. *Proc Natl Acad Sci U S A* 104, 8305-10.
- [31] Dong, G., Medkova, M., Novick, P. and Reinisch, K.M. (2007). A catalytic coiled coil: structural insights into the activation of the Rab GTPase Sec4p by Sec2p. *Mol Cell* 25, 455-62.
- [32] Rak, A. et al. (2003). Structure of Rab GDP-dissociation inhibitor in complex with prenylated YPT1 GTPase. *Science* 302, 646-50.
- [33] Constantinescu, A.T., Rak, A., Alexandrov, K., Esters, H., Goody, R.S. and Scheidig, A.J. (2002). Rab-subfamily-specific regions of Ypt7p are structurally different from other RabGTPases. *Structure* 10, 569-79.
- [34] Esters, H., Alexandrov, K., Constantinescu, A.T., Goody, R.S. and Scheidig, A.J. (2000). High-resolution crystal structure of *S. cerevisiae* Ypt51(DeltaC15)-GppNHp, a small GTP-binding protein involved in regulation of endocytosis. *J Mol Biol* 298, 111-21.
- [35] Greasley, S.E., Jhoti, H., Teahan, C., Solari, R., Fensome, A., Thomas, G.M., Cockcroft, S. and Bax, B. (1995). The structure of rat ADP-ribosylation factor-1 (ARF-1) complexed to GDP determined from two different crystal forms. *Nat Struct Biol* 2, 797-806.
- [36] Renault, L., Guibert, B. and Cherfils, J. (2003). Structural snapshots of the mechanism and inhibition of a guanine nucleotide exchange factor. *Nature* 426, 525-30.
- [37] Mossessova, E., Corpina, R.A. and Goldberg, J. (2003). Crystal structure of ARF1\*Sec7 complexed with Brefeldin A and its implications for the guanine nucleotide exchange mechanism. *Mol Cell* 12, 1403-11.
- [38] Shiba, T. et al. (2003). Molecular mechanism of membrane recruitment of GGA by ARF in lysosomal protein transport. *Nat Struct Biol* 10, 386-93.
- [39] Menetrey, J. et al. (2007). Structural basis for ARF1-mediated recruitment of ARHGAP21 to Golgi membranes. *Embo J* 26, 1953-62.

- [40] Seidel, R.D., 3rd, Amor, J.C., Kahn, R.A. and Prestegard, J.H. (2004). Conformational changes in human Arf1 on nucleotide exchange and deletion of membrane-binding elements. *J Biol Chem* 279, 48307-18.
- [41] Amor, J.C., Horton, J.R., Zhu, X., Wang, Y., Sullards, C., Ringe, D., Cheng, X. and Kahn, R.A. (2001). Structures of yeast ARF2 and ARL1: distinct roles for the N terminus in the structure and function of ARF family GTPases. *J Biol Chem* 276, 42477-84.
- [42] Pasqualato, S., Menetrey, J., Franco, M. and Cherfils, J. (2001). The structural GDP/GTP cycle of human Arf6. *EMBO Rep* 2, 234-8.
- [43] Menetrey, J., Macia, E., Pasqualato, S., Franco, M. and Cherfils, J. (2000). Structure of Arf6-GDP suggests a basis for guanine nucleotide exchange factors specificity. *Nat Struct Biol* 7, 466-9.
- [44] O'Neal, C.J., Jobling, M.G., Holmes, R.K. and Hol, W.G. (2005). Structural basis for the activation of cholera toxin by human ARF6-GTP. *Science* 309, 1093-6.
- [45] Rao, Y., Bian, C., Yuan, C., Li, Y., Chen, L., Ye, X., Huang, Z. and Huang, M. (2006). An open conformation of switch I revealed by Sar1-GDP crystal structure at low Mg<sup>2+</sup>. *Biochem Biophys Res Commun* 348, 908-15.
- [46] Huang, M. et al. (2001). Crystal structure of Sar1-GDP at 1.7 Å resolution and the role of the NH<sub>2</sub> terminus in ER export. *J Cell Biol* 155, 937-48.
- [47] Bi, X., Corpina, R.A. and Goldberg, J. (2002). Structure of the Sec23/24-Sar1 pre-budding complex of the COPII vesicle coat. *Nature* 419, 271-7.
- [48] Bi, X., Mancias, J.D. and Goldberg, J. (2007). Insights into COPII coat nucleation from the structure of Sec23.Sar1 complexed with the active fragment of Sec31. *Dev Cell* 13, 635-45.
- [49] Wang, Z.X., Shi, L., Liu, J.F., An, X.M., Chang, W.R. and Liang, D.C. (2005). 2.0 Å crystal structure of human ARL5-GDP3'P, a novel member of the small GTP-binding proteins. *Biochem Biophys Res Commun* 332, 640-5.
